# Supplementary material for: GATA1 regulates the microRNA-328-3p/PIM1 axis via circular RNA ITGB1 to promote renal ischemia/reperfusion injury in HK-2 cells
Source: PubMed Central journal article supplement — Int J Mol Med. 2022 Jun 7;50(2):100. doi: 10.3892/ijmm.2022.5156 (PMC9242654; doi:10.3892/ijmm.2022.5156), 2022-06-07

Figure S1. RT-qPCR analysis of plasmid transfection efficiency. (A) Overexpression of miR-328-3p in HK-2 cells using miR-328-3p mimic was validated using RT-qPCR. (B) The expression of miR-328-3p in HK-2 cells was examined using RT-qPCR to verify the efficiency of interference following miR-328-3p inhibitor transfection. (C) The expression levels of PIM1 in siNC/siPIM1-transfected HK-2 cells were examined using RT-qPCR. (D) The expression level of circITGB1 in siRNAs-transfected HK-2 cells was examined using RT-qPCR. (E) The expression level of UBR4 in siRNAs-transfected HK-2 cells was examined using RT-qPCR. (F) RT-qPCR illustrating an increase in GATA1 mRNA expression levels upon ov-GATA1 transfection, in comparison to the empty vector. (G) GATA1 expression analysis using RT-qPCR illustrating the siRNA knock-down of GATA1 in HK-2 cells. \*\* $P < 0.01$  and \*\*\* $P < 0.001$  ns, not significant; RT-qPCR, reverse transcription-quantitative PCR; PIM1, pim-1 proto-oncogene; GATA1, GATA binding protein 1; ITGB1, integrin beta 1; UBR4, ubiquitin protein ligase E3 component n-recognin 4.

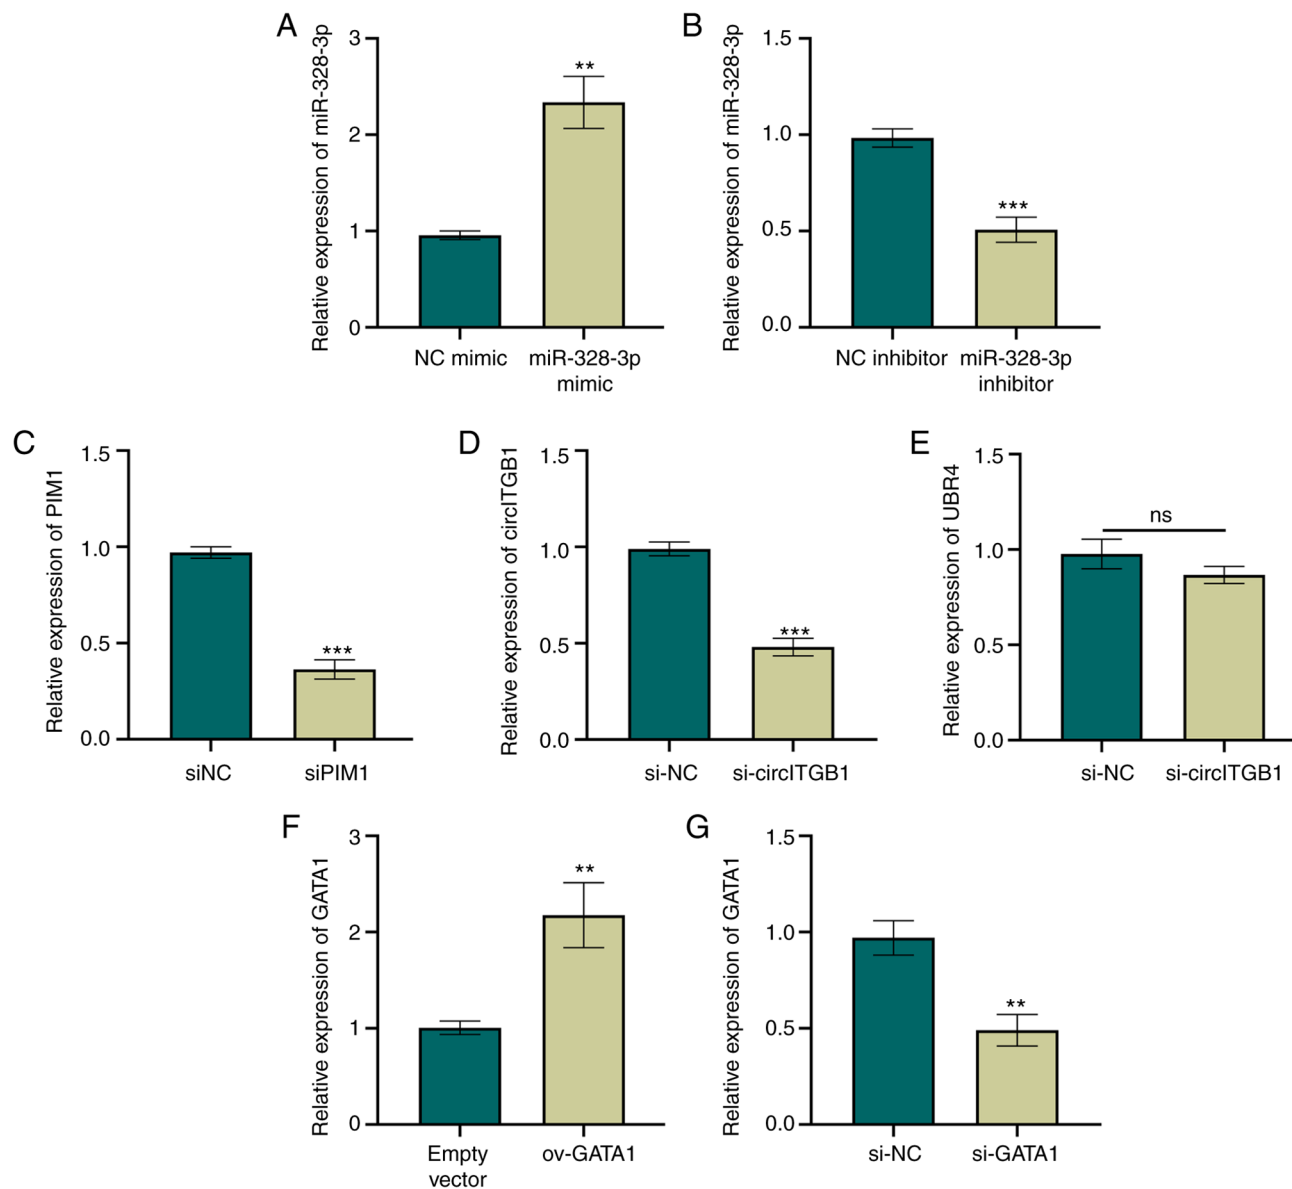

Supplement: Supplementary_Data.pdf [file Supplementary_Data.pdf]
